# Supplementary material
Source: publisher figshare collection journal article supplement (https://tandf.figshare.com/ndownloader/files/14886767)
Supplement: Supplementary file 1 [file 14886767]

<?xml version='1.0' encoding='UTF-8' ?>
<!--
Submission and peer-review metadata for articles processed in the ScholarOne Manuscripts system for more information go to www.scholarone.com
-->

<!--  ScholarOne DTD

rev 4.24
- - Added conversations
- - Added credit_taxonomy_role_list, credit_taxonomy_role for Author- Credit Taxonomy - Contributor Roles
rev 4.23.2
- - added file_createddate to <file>
rev 4.23.1
- - no DTD modifications made in the ScholarOne Manuscripts v4.23 release

rev 4.23
- - no DTD modifications made in the ScholarOne Manuscripts v4.23 release
rev 4.22
- - added publons_optIn to <review>
- - added external_id to <article>
rev 4.21
- - no DTD modifications made in the ScholarOne Manuscripts v4.21 release
rev 4.20
- - no DTD modifications made in the ScholarOne Manuscripts v4.20 release
rev 4.19
- - added OA Publication Type (element named publication_model due to naming conflict)
rev 4.18
- - added received_date_resub (optional) for US-001433.
- -  added orcid_token_type (optional) orcid_token_scope (optional) orcid_token_expires_in (optional) to in the author_list and user_list entities
rev 4.17
- - Added institution_id (optional) to affil_details (for Ringgold ID). Blank if no Ringgold ID entered.  
rev 4.16
- - no DTD modifications made in the ScholarOne Manuscripts v4.16 release
rev 4.15
- - no_funders
- - added support for multiple grant #'s
rev 4.14
- - added orcid_id_validation element in the author_list and user_list entities.
rev 4.13
- - new country codes added
- - removed inf tag and added sub tag
- - added fundref_information with sub-elements in article element group
rev 4.12
- - no DTD modifications made in the ScholarOne Manuscripts v4.12 release
rev 4.11
- - no DTD modifications made in the ScholarOne Manuscripts v4.11 release
rev 4.10
- - added orcid element to person_basic entity
rev 4.9
- - (Also see ScholarOne Manuscripts v4.9 DTD Updates notification) 
- - added the full hierarchical path for attributes for both manuscripts and users 
- - added attr_type_id, attribute_id, with optional elements parent_id, selected 
- - added optional entry, reviewer_list, reviewer element with required attributes role, user_id, invite_history, response element with required attributes response_name, response_type, response_history, required child element rating 
- - added optional entry, task under ms_id with required attributes type, name, task_id, and optional status child element with required attributes status_task_id, user_id, s1_staff, user_role, event_date; optional child element assigned and invited with optional attribute user_id and required attributes role, date; optional child element recommendation with required attributes recommendation_type, recommendation_name and optional child element comment; optional child element review with required attribute user_id and optional child elements of recommendation with required attributes recommendation_type and recommendation_name, score with optional child elements custom_fields, review_file with required attribute file_id, comment with required attribute to_role, to_name 
- - added optional entry, email_list with optional child elements email_sent with required attribute doc_task_id, cc with optional attribute user_id, and file; also a required child element send_date, to with optional attribute user_id, subject, and body 
- - added optional entry, user_list, user element following the current editor element structure with the attributes role and decided removed, with attributes submitter, submitting agent and contact added

rev 4.8
- added most_recent_decision_date,  transmission_date to ms_id

rev 4.7
- - no DTD modifications made in the ScholarOne Manuscripts v4.7 release

rev 4.5
- - added researcher_id element to person_basic entity

rev 4.3a
- - Allow empty <forms/> element in output (100420-0151476)

rev 4.3
- - Add forms element and sub-elements
- - Change iso3166 enumeration to match countries in system

rev 4.2.1a
- - updated 'referenced_articles' to precede 'lte_text_area'
- - updated 'referenced_article' child declaration in 'referenced_articles' to 'reference_article'
- - added 'reference_article' element

rev 4.2.1
- - Added hour, minute, second, time_zone element to date
- - Added flags element to person

rev 4.2
- - new optional child elements named issue_journal_id, issue_journal_issn, issue_journal_isbn, issue_journal_eisbn, issue_end_page, issue_print_run in issue_assignment
- - included a "topic_group" element
- - "topic_group" element now included a �topic� element
- - the "ms_id" element within the "history" element was be modified
- - the "ms_id" element contained child elements "stub_created_date" and "author_assigned_date"
rev 4.1.2
- - added addr3 to affiliation (address) 

rev 4.1.1
- - new country codes added and all the country codes are made UPPERCASE now

rev 4.1
- - new optional child elements named transferred_date, issue_journal_name, issue_start_page in issue_assignment

rev 4.01
- - September 2007 (Noah Merritt)
- - Added NLM reference structure
- - Relaxed required element structure to accomodate reference xml partial metadata
- - companion paper changed to "zero or more" from "zero or one"
- - added pub-id-types ut to identify WoS id values

rev 3.6 
- - Feb 14 2007 (Nick Menon)
- -	Added custom_report_fields? 
- -	Added custom_report_field* as a child of custom_report_fields

rev 3.5.1
- - Added client data?
- - Added article_sub_title?

rev 2.4 		20 March 2006 (Ganesh)
- - removed published_date? , publish_before_print_date? , print_scheduled_date? from ms_id

rev 2.4 	  	6 March 2006 (Ganesh)
- - copied "publish_before_print_date", "published_date" and "print_scheduled_date" in to issue_assignment_block (intent to populate in issue_assignment_block and *not* in history block)
- - added "dtd_version" as an attribute to the article_set element (required)
- - added the values "grayscale" and "undefined" to the list of enumerated values for the "file_colorspace" attribute
- - added "image_resolution" attribute to the file element (optional)
- - added "image_height" attribute to the file element (optional)
- - added "image_width" attribute to the file element (optional)
- - added "dx_result attribute to the file element (optional)
- - added "profile_affiliation" element - content made of %affil_details entity, and the "profile_affiliation" element will be part of the %person_detail entity (optional)
- - added "current_profile_affiliation" element - content made of %affil_details entity, and the "current_profile_affiliation" element will be part of the %person_detail entity (optional)
- - eliminated "doi" element
- - added "doi" to the list of enumerated values for the "id_type" attribute
- - eliminated "fax" and "phone" elements from the %person_detail entity - they now are only part of the %affil_details entity
- - changed "ms_id" to be required and repeatable within the context of a "companion_paper" block
- - eliminated "specialty" attribute from the "editor" element
- - added "person_title" to the %affil_details entity (optional)
- - eliminated the "full_name" element
- - moved "degree," "email," "attribute" and "comments" elements from the %person_detail entity to the %person_basic entity
- - eliminated "season" element
- - added "total_pdf_pages" as element in the "content" block (optional)
- - added author_returned_date as element in the ms_id block (optional)


rev 2.4			16 Feb 2006 (Senthil)
- - removed "cd_text" attribute from custom_fields element 
- - added current_profile_affiliation to person_basic

rev 2.3.1      	28 September 2004 (EJK)

- - add volume_page_actual attribute (attribute to volume)
- - add bw_image_count_issue   (attribute for issue)
- - added color_image_count_issue (attribute for issue)
- - changed num_issue_pages to issue_page_actual  (attribute)
- - added issue_page_budget (attribute to issue)

rev 2.3 		24 August 2004 (EJK)

- - added "phone" and "fax" to affiliation details so that each department can have its own (both type text)
- - added "room" to affiliation (address) details to collect room/suite number (type text)
- - added "issn_type" attribute to issn element:  attribute value required (enumerated)
- - changed "issn" so that it is now optional and repeatable
- - added "issue_description" as an issue identifier (type text)
- - added "issue_assignment" element block:  issue_assignment is optional and repeatable (element block)
- - moved volume, issue, issue_description, issue_date and line_up_number into issue_assignment block.  
- - added "current_issue" attribute (as a flag) to issue_assignment element (type string)
- - added "companion_paper" element block to article:  optional and repeatable (element block)
- - added "building" and "post_office_box" to affil_details (both type text)
- - added "total_pages_calc," "total_pages_actual," "total_tables," "num_color_figures," "num_bw_figures" and "total_figures" to content block: (all type text)
- - added "num_pages_calc" and "num_pages_actual" to file block:  (type text)
- - added "volume_page_budget" attribute to volume element (type string)
- - added "num_issue_pages" attribute to issue element (type string)
- - added "ms_no" attribute to "ms_id" element (attribute required)

rev. 2.2.3  17 August 2004 (EJK)

- - Updated ISO3166 codes

rev. 2.2.3  13 April 2004 (EJK)

- -  Added journal_abbreviation element (optional)

rev. 2.2.2  22 March 2004 (EJK/JS)

- -  Made country_code optional
- -  Added DOI element - type text

rev. 2.2.1  12 March 2004 (EJK)

- -  Repurposed "comments" as an attribute for author, editor and office_contact (as part of person_details element)

rev. 2.2  29 February  2004 (EJK)

- -  Made <issue_date> optional
- -  Added "country_code" attribute to <country> element.
        -  country_code enumerated to ISO 3166 set of legal values - required
- - lang attribute now enumerated to ISO 639-1 set of legal values - default set to ENglish
- - id_type is now required (attribute for article_id)
- - attributes for <author> updated:
                - -  "corr" now type boolean
                - -  added "contact" - type boolean
                - -  added "author_seq" - type integer
                - -  added "user_id" - type text
- - attributes for <editor> updated:
                - - added "user_id" - type text
                - - added "decided" - type boolean
- - attributes for <office_contact> updated:
                - - added "user_id" - type text
- - attributes for <article_status> updated:
                - - added "decision_status" - enumerated & required


rev. 2.1   30 July 2003 (EJK)

- - added file_tag as an element under the file element.

rev. 2.0  (Changes from v. 1.0 )  1 July 2003 (EJK)

 - -  Changed <keywords> tag to <attribute> tag with an "attr_name" attribute to mark whether it is a keyword or some other kind of attribute (ex. <attribute attr_name='keyword'>neuroscience</attribute>

- -  Added <attribute> to % PERSON_DETAIL entity  (for individual person attributes)
- -  Added <attribute> to FILE block  (for attributes associated with individual files)
- -  Moved <attribute> from ARTICLE block to the CONTENT block (for attributes associated with entire manuscript)

- -  created a CONTENT element block and moved FIRST_PAGE and LAST_PAGE as elements under CONTENT

- -  added new tags to the FILE element block:
       -  <file_number>
       -  <file_extension>
       -  <file_colorspace> with enumerated values of cmyk, rgb, bw
       -  <file_designation>
       -  <file_caption>
       -  <file_originalname>
       -  <submission_medium> with enumerated values of offline, online
-  added new tags to HISTORY block
       -  <publish_before_print_date>
       -  <print_scheduled_date>
-  added new tag to JOURNAL block
       -  <line_up_number>
-  added an OFFICE_LIST block that contains repeating entities:
       -  % PERSON_BASIC
       -  % PERSON_DETAIL

-  changed <publish_before_print_date> and <print_scheduled_date> to use %date as subelements

-  changed <configurable_data> element to <custom_fields>

- changed attribute "cd_label" to "cd_name"

- Version 3.4 additions
	added galleyDeliveryType for author attributes. 
	added transmission_date for a document attributes
	
- Added LTE information, ref articles and webPub date.
- /*************** W-B05 ************************/
	
	-      added reviewer_list email_list* user_list* to the article element
	
	- 	   added email_list element, its attributes and child elements
	
	- 	   added reviewer_list element, its attributes and child elements
	
	- 	   added user_list element, its attributes and child elements
	
	- 	   added task element to ms_id
	
	- 	   added task element, its attributes and child elements
-/*************** W-B05 ************************/	
  -->

<!ENTITY % person_detail "(affiliation* , profile_affiliation?, current_profile_affiliation?, galleyDeliveryType? )">

<!ENTITY % person_basic "(salutation? , first_name , middle_name? , last_name , suffix?, degree* , email* , credit_taxonomy_role_list?, attr_type* , attribute* , comments?, flags?, researcher_id?, orcid?, orcid_id_validation?, orcid_token_type?, orcid_token_scope?, orcid_token_expires_in?)">

<!ENTITY % pub.status "(received | accepted | epublish | ppublish | revised | aheadofprint | pmc | pmcr | pubmed | pubmedr | premedline | medline | medliner)">

<!ENTITY % art-id-type "(doi | pii | pmcpid | pmpid | pubmed | medline | pmcid)">

<!ENTITY % affil_details "(inst , (institution_id?, dept?, person_title?, room? , building? , addr1? , addr2? , addr3?, post_office_box? , city , (state | province)? , country , post_code? , phone? , fax?)*)">

<!ENTITY % data "sup | sub | b | i">

<!ENTITY % date "(year, month?, day?, hour?, minute?, second?, time_zone?)">

<!ENTITY % submission_medium "online | offline">

<!-- country codes -->
<!ENTITY % iso3166 "(AD|AE|AF|AG|AI|AL|AM|AN|AO|AQ|AR|AS|AT|AU|AW|AX|AZ|BA|BB|BD|BE|BF|BG|BH|BI|BJ|BL|BM|BN|BO|BQ|BR|BS|BT|BV|BW|BY|BZ|CA|
                           CC|CD|CF|CG|CH|CI|CK|CL|CM|CN|CO|CR|CS|CU|CV|CW|CX|CY|CZ|DE|DJ|DK|DM|DO|DZ|EC|EE|EG|EH|ER|ES|ET|FI|FJ|FK|FM|FO|FR|GA|
                           GB|GD|GE|GF|GG|GH|GI|GL|GM|GN|GP|GQ|GR|GS|GT|GU|GW|GY|HK|HM|HN|HR|HT|HU|ID|IE|IL|IM|IN|IO|IQ|IR|IS|IT|JE|JM|JO|JP|
                           KE|KG|KH|KI|KM|KN|KP|KR|KW|KY|KZ|LA|LB|LC|LI|LK|LR|LS|LT|LU|LV|LY|MA|MC|MD|ME|MF|MG|MH|MK|ML|MM|MN|MO|MP|MQ|MR|MS|
                           MT|MU|MV|MW|MX|MY|MZ|NA|NC|NE|NF|NG|NI|NL|NO|NP|NR|NU|NZ|OM|PA|PE|PF|PG|PH|PK|PL|PM|PN|PR|PS|PT|PW|PY|QA|RE|RO|RS|
                           RU|RW|SA|SB|SC|SD|SE|SG|SH|SI|SJ|SK|SL|SM|SN|SO|SR|SS|ST|SV|SX|SY|SZ|TC|TD|TF|TG|TH|TJ|TK|TL|TM|TN|TO|TP|TR|TT|TV|TW|TZ|
                           UA|UG|UM|US|UY|UZ|VA|VC|VE|VG|VI|VN|VU|WF|WS|YE|YT|YU|ZA|ZM|ZW)">

<!--language codes-->
<!ENTITY % iso639-1 "(AA|AB|AF|AM|AR|AS|AY|AZ|BA|BE|BG|BH|BI|BN|BO|BR|CA|CO|CS|CY|
                           DA|DE|DZ|EL|EN|EO|ES|ET|EU|FA|FI|FJ|FO|FR|FY|GA|GD|GL|GN|GU|
                           HA|HI|HR|HU|HY|IA|IE|IK|IN|IS|IT|IW|JA|JI|JW|KA|KK|KL|KM|KN|
                           KO|KS|KU|KY|LA|LN|LO|LT|LV|MG|MI|MK|ML|MN|MO|MR|MS|MT|MY|NA|
                           NE|NL|NO|OC|OM|OR|PA|PL|PS|PT|QU|RM|RN|RO|RU|RW|SA|SD|SG|SH|
                           SI|SK|SL|SM|SN|SO|SQ|SR|SS|ST|SU|SV|SW|TA|TE|TG|TH|TI|TK|TL|
                           TN|TO|TR|TS|TT|TW|UK|UR|UZ|VI|VO|WO|XH|YO|ZH|ZU)">

<!-- This is the top level element -->
<!ELEMENT article_set (article+)>
<!ATTLIST article_set
	xmlns:xlink CDATA  #IMPLIED
	dtd_version CDATA #REQUIRED
>

<!-- Start of article group -->
<!ELEMENT article (journal? , replaces? , article_status? , article_title? ,article_sub_title?, vernacular_title? , author_list? , author_comments? , editor_list?, reviewer_list* , publication_type? , article_id_list? , file_list? , history? , fulltext_url? , abstract? , configurable_data_fields? , topic_group*, notes? , content? , office_contact* , companion_paper*, client_data?, custom_report_fields?, referenced_articles?, lte_text_area?, email_list*, user_list*, forms?, back?, fundref_information?, conversations?, publication_model?)>
<!ATTLIST article  ms_no       CDATA  #IMPLIED
					external_id CDATA  #IMPLIED
                     rev         CDATA  #IMPLIED
                     lang        %iso639-1;        "EN"
                     export_date CDATA #IMPLIED
                     tracking_no CDATA #IMPLIED>

<!-- Start of journal group -->
<!ELEMENT journal (publisher_name , full_journal_title , journal_abbreviation? , pubmed_abbreviation , issn+ , issue_assignment*)>

<!ELEMENT publisher_name (#PCDATA)>

<!ELEMENT full_journal_title (#PCDATA)>

<!ELEMENT pubmed_abbreviation (#PCDATA)>

<!ELEMENT issn (#PCDATA)>

<!ATTLIST issn  issn_type  (print | digital )  #REQUIRED >
<!ELEMENT volume (#PCDATA)>

<!ATTLIST volume  volume_page_budget CDATA  #IMPLIED
                    volume_page_actual CDATA  #IMPLIED >
                    
<!ELEMENT issue (#PCDATA)>
                    
<!ELEMENT client_data (client_journal_id?,client_article_id?,client_article_guid?)>

<!ELEMENT client_journal_id  (#PCDATA)>
<!ELEMENT client_article_id (#PCDATA)>
<!ELEMENT client_article_guid (#PCDATA)>

<!-- Start of custom_report_fields -->
<!ELEMENT custom_report_fields (custom_report_field*)>

<!ELEMENT custom_report_field EMPTY>

<!ATTLIST custom_report_field crf_name CDATA #REQUIRED
							   crf_value CDATA #REQUIRED >
<!-- End of custom_report_fields -->

<!-- Start of referenced_articles -->
<!ELEMENT referenced_articles (reference_article*)>

<!ELEMENT reference_article  EMPTY>

<!ATTLIST reference_article refArt_name CDATA #REQUIRED >

<!-- End of referenced_articles -->

<!ELEMENT web_publish_date (%date;)>

<!ELEMENT lte_text_area  (#PCDATA)>

<!--start of email_list -->
<!ELEMENT email_list  (email_sent*)>

<!ELEMENT email_sent  (send_date, to*, cc*, subject, body, email_file*)>
<!ATTLIST email_sent doc_task_id CDATA  #IMPLIED>

<!ELEMENT send_date  (%date;)>

<!ELEMENT to  (#PCDATA)>
<!ATTLIST to user_id CDATA  #IMPLIED>

<!ELEMENT user_id (#PCDATA)>

<!ELEMENT cc (#PCDATA)>
<!ATTLIST cc user_id CDATA  #IMPLIED>

<!ELEMENT subject (#PCDATA)>

<!ELEMENT body (#PCDATA)>

<!ELEMENT email_file  (#PCDATA)>
<!ATTLIST email_file file_originalname CDATA  #REQUIRED>

<!--End of email_list  -->

<!ELEMENT attribute (#PCDATA)>
<!ATTLIST attribute attr_name CDATA  #IMPLIED>
<!ATTLIST attribute id CDATA  #IMPLIED>
<!ATTLIST attribute name CDATA  #IMPLIED>
<!ATTLIST attribute parent_id CDATA  #IMPLIED>

<!ELEMENT attr_type  (attribute+)>
<!ATTLIST attr_type id CDATA  #REQUIRED>
<!ATTLIST attr_type name CDATA  #REQUIRED>


<!--start of user_list  -->
<!ELEMENT user_list (user+)>

<!ELEMENT user (%person_basic; , %person_detail;)>

<!ATTLIST user is_staff CDATA  #REQUIRED>
<!ATTLIST user user_id CDATA  #REQUIRED>
<!ATTLIST user submitter CDATA  #REQUIRED>
<!ATTLIST user submitting_agent CDATA  #REQUIRED>
<!ATTLIST user contact CDATA  #REQUIRED>
<!--End of user_list -->


<!ELEMENT forms (form*)>

<!ELEMENT form (form_submitted_date, form_submitter)>

<!ELEMENT form_submitted_date (%date;)>

<!ELEMENT form_submitter (%person_basic; , %person_detail;)>

<!ATTLIST form form_task_name  CDATA  #REQUIRED 
                 form_file_name CDATA #REQUIRED>

<!ATTLIST issue  issue_seq               CDATA  #IMPLIED
                   issue_page_actual       CDATA  #IMPLIED
                   issue_page_budget       CDATA  #IMPLIED
                   bw_image_count_issue    CDATA  #IMPLIED
                   color_image_count_issue CDATA  #IMPLIED >
<!ELEMENT issue_date (%date;)>

<!-- End of journal group -->
<!ELEMENT replaces (#PCDATA)>

<!ELEMENT article_status (#PCDATA)>

<!ATTLIST article_status  decision_status  (undecided | reject | accept | revise )  #REQUIRED >
<!ELEMENT article_title (#PCDATA | %data;)*>
<!ELEMENT article_sub_title (#PCDATA | %data;)*>

<!ELEMENT vernacular_title (#PCDATA | %data;)*>

<!ELEMENT first_page (#PCDATA)>

<!ELEMENT last_page (#PCDATA)>

<!-- Start of author_list -->
<!ELEMENT author_list (author+)>

<!ELEMENT author (%person_basic; , %person_detail;)>

<!ATTLIST author  corr       CDATA  '0'
                    contact    CDATA  '0'
                    author_seq CDATA  #REQUIRED
                    auth_URL   CDATA  #IMPLIED
                    user_id    CDATA  #REQUIRED >
<!--End of author group -->
<!ELEMENT author_comments (#PCDATA)>

<!-- Start of editor_list -->
<!ELEMENT editor_list (editor+)>

<!-- 32873: Removed credit_taxonomy_role_list as part of defect. It is part of person_basic -->
<!ELEMENT editor (%person_basic; , %person_detail;)>

<!ATTLIST editor  role      CDATA  #IMPLIED
                    is_staff  CDATA  '1'
                    user_id   CDATA  #REQUIRED
                    decided   CDATA  '0' >
<!-- End of editor_list -->

<!-- Start of reviewer_list -->
<!ELEMENT reviewer_list (reviewer*)>

<!ELEMENT reviewer (%person_basic;, %person_detail; , response* , rating)>
<!ATTLIST reviewer role CDATA  #REQUIRED>
<!ATTLIST reviewer user_id CDATA  #REQUIRED>
<!ATTLIST reviewer invite_history CDATA  #REQUIRED>

<!ELEMENT response (#PCDATA)>
<!ATTLIST response response_name CDATA  #REQUIRED>
<!ATTLIST response response_type CDATA  #REQUIRED>
<!ATTLIST response response_history  CDATA  #REQUIRED>

<!ELEMENT rating (#PCDATA)>

<!-- End of reviewer_list -->


<!ELEMENT publication_type (#PCDATA)>

<!-- Start of article_id_list -->
<!ELEMENT article_id_list (article_id*)>

<!ELEMENT article_id (#PCDATA)>

<!ATTLIST article_id  id_type %art-id-type; #REQUIRED                               >
<!-- End of article_id_list -->


<!-- Start of file_list -->
<!ELEMENT file_list (file*)>

<!ELEMENT file (file_createddate ,file_designation , file_format? , file_extension , file_originalname , file_caption? , file_tag? , attr_type*, attribute* , num_pages_calc? , num_pages_actual?)>

<!ATTLIST file  file_name         CDATA  #REQUIRED
                  file_category     CDATA  #REQUIRED
                  file_colorspace    (rgb | cmyk | bw | grayscale | undefined)  #IMPLIED
                  submission_medium  (online | offline )  #IMPLIED 
                  image_resolution CDATA #IMPLIED 
				  image_width CDATA #IMPLIED 
				  image_height CDATA #IMPLIED 
			   	  dx_result CDATA #IMPLIED
>
<!-- End of file_list -->
<!-- Start of history group -->
<!ELEMENT history (ms_id+)>

<!ELEMENT submitted_date (%date;)>

<!ELEMENT received_date (%date;)>

<!ELEMENT received_date_resub (%date;)>

<!ELEMENT revised_date (%date;)>

<!ELEMENT decision_date (%date;)>

<!-- Start of 10996 -->

<!ELEMENT most_recent_decision_date (%date;)>
 
<!-- end of 10996 -->

<!-- LH 3507 B -->
<!ELEMENT approval_date (%date;)>
<!-- LH 3507 E -->

<!ELEMENT published_date (%date;)>

<!ELEMENT stub_created_date (%date;)>

<!ELEMENT author_assigned_date (%date;)>

<!ATTLIST published_date  pub_status CDATA  #IMPLIED >
<!-- End of history group -->
<!ELEMENT fulltext_url (#PCDATA)>

<!ELEMENT abstract (#PCDATA | %data;)*>

<!-- Start of configurable_data_fields -->
<!ELEMENT configurable_data_fields (custom_fields+)>

<!ELEMENT custom_fields EMPTY>

<!ATTLIST custom_fields  cd_value CDATA  #REQUIRED
                           cd_code  CDATA  #REQUIRED
                           cd_name  CDATA  #IMPLIED >
<!-- End of configurable_data_fields -->
<!-- Start of topic_group -->
<!ELEMENT topic_group (topic+)>
<!ELEMENT topic (#PCDATA)>
<!ATTLIST topic
topic_parent CDATA #IMPLIED
topic_path CDATA #IMPLIED
topic_status CDATA #REQUIRED >

<!--End of topic_group-->
<!ELEMENT notes (#PCDATA)>

<!-- Start of FundRef -->
<!ELEMENT fundref_information (no_funders,funder*)>
<!ELEMENT no_funders (#PCDATA)>
<!ELEMENT funder (preferred_label, concept_id, grant_number*)>
<!ELEMENT preferred_label (#PCDATA)>
<!ELEMENT concept_id (#PCDATA)>
<!ELEMENT grant_number (#PCDATA)>
<!-- End of FundRef -->

<!--Start of Conversations -->
<!ELEMENT conversations (conversation)*>
<!ATTLIST conversations xmlns CDATA #FIXED ''>
<!ELEMENT conversation (post)*>
<!ATTLIST conversation
  conversation_name CDATA #IMPLIED
  conversation_status NMTOKEN #IMPLIED
  final_closed_date CDATA #IMPLIED
  orig_open_date CDATA #IMPLIED>
<!ELEMENT post (post_author,post_date,post_content)>
<!ATTLIST post seq CDATA #IMPLIED>
<!ATTLIST post hidden CDATA #IMPLIED>
<!ELEMENT post_author (#PCDATA)>
<!ELEMENT post_date (#PCDATA)>
<!ELEMENT post_content (#PCDATA)>
<!--End of Conversations -->

<!-- End of Article group -->
<!-- Element definitions for person_detail entity -->
<!ELEMENT affiliation (%affil_details;)>

<!ATTLIST affiliation  seq  (1 | 2 | 3 | 4 | 5 | 6 )  '1' >
<!ELEMENT degree (#PCDATA)>

<!ELEMENT email (#PCDATA)>

<!ATTLIST email  addr_type  (primary | secondary )  #IMPLIED
                   active    CDATA  '1' >
<!ELEMENT phone (#PCDATA)>

<!ELEMENT fax (#PCDATA)>

<!ELEMENT comments (#PCDATA)>

<!-- Element definitions for person_basic entity -->
<!ELEMENT salutation (#PCDATA)>

<!ELEMENT first_name (#PCDATA)>

<!ELEMENT middle_name (#PCDATA)>

<!ELEMENT last_name (#PCDATA)>

<!ELEMENT suffix (#PCDATA)>

<!ELEMENT galleyDeliveryType (#PCDATA)>

<!ELEMENT flags (flag+)>

<!ELEMENT flag (#PCDATA)>

<!ATTLIST flag  color CDATA #REQUIRED>

<!-- Element definitions for affil_details entity -->
<!ELEMENT inst (#PCDATA)>

<!ELEMENT dept (#PCDATA)>

<!ELEMENT addr1 (#PCDATA)>

<!ELEMENT addr2 (#PCDATA)>

<!ELEMENT addr3 (#PCDATA)>

<!ELEMENT city (#PCDATA)>

<!ELEMENT state (#PCDATA)>

<!ELEMENT province (#PCDATA)>

<!ELEMENT country (#PCDATA)>

<!ATTLIST country  country_code %iso3166; #IMPLIED                           >
<!ELEMENT post_code (#PCDATA)>

<!-- Element definitions for data entity -->
<!ELEMENT sup (#PCDATA)>

<!ELEMENT b (#PCDATA)>

<!ELEMENT i (#PCDATA)>

<!ELEMENT u (#PCDATA)>

<!-- Element definitions for dates -->
<!ELEMENT year (#PCDATA)>

<!ELEMENT month (#PCDATA)>

<!ELEMENT day (#PCDATA)>

<!ELEMENT hour (#PCDATA)>

<!ELEMENT minute (#PCDATA)>

<!ELEMENT second (#PCDATA)>

<!ELEMENT time_zone (#PCDATA)>

<!ELEMENT task (status, picked*, invited*, assigned*, recommendation*, review*,decision*)>
<!ATTLIST task type CDATA  #REQUIRED>
<!ATTLIST task name CDATA  #REQUIRED>
<!ATTLIST task task_id CDATA  #REQUIRED>

<!ELEMENT ms_id (rev_id? , submitted_date? , received_date? , received_date_resub? , revised_date? , decision_date? , approval_date? , author_returned_date?, stub_created_date?, author_assigned_date?, most_recent_decision_date, transmission_date, web_publish_date?, task*)>

<!ATTLIST ms_id ms_no CDATA  #IMPLIED tracking_no CDATA  #IMPLIED>
<!ATTLIST picked external_id CDATA  #IMPLIED>

<!--ATTLIST ms_id  ms_no CDATA  #REQUIRED -->

<!ELEMENT status (#PCDATA)>
<!ATTLIST status doc_task_id CDATA  #REQUIRED>
<!ATTLIST status user_id CDATA  #REQUIRED>
<!ATTLIST status s1_staff CDATA  #REQUIRED>
<!ATTLIST status user_role CDATA  #REQUIRED>
<!ATTLIST status  event_date CDATA  #REQUIRED>

<!ELEMENT picked (#PCDATA)>
<!ATTLIST picked user_id CDATA  #IMPLIED>
<!ATTLIST picked role CDATA  #REQUIRED>
<!ATTLIST picked date CDATA  #REQUIRED>

<!ELEMENT invited (#PCDATA)>
<!ATTLIST invited user_id CDATA  #IMPLIED>
<!ATTLIST invited role CDATA  #REQUIRED>
<!ATTLIST invited date CDATA  #REQUIRED>

<!ELEMENT assigned (#PCDATA)>
<!ATTLIST assigned user_id CDATA  #IMPLIED>
<!ATTLIST assigned role CDATA  #REQUIRED>
<!ATTLIST assigned date CDATA  #REQUIRED>

<!ELEMENT recommendation (recommendation_comments*)>
<!ATTLIST recommendation recommendation_type CDATA  #REQUIRED>
<!ATTLIST recommendation recommendation_name CDATA  #REQUIRED>

<!ELEMENT review (recommendation*,review_comments*,score*,review_file*,publons_optIn*)>
<!ATTLIST review user_id CDATA  #REQUIRED>

<!ELEMENT score (custom_fields+)>

<!ELEMENT review_file (#PCDATA)>
<!ATTLIST review_file file_id CDATA  #REQUIRED>

<!ELEMENT decision (decision_comments*)>
<!ATTLIST decision decision_type CDATA  #REQUIRED>
<!ATTLIST decision decision_name CDATA  #REQUIRED>


<!ELEMENT review_comments (comment*)>
<!ELEMENT decision_comments (comment*)>
<!ELEMENT recommendation_comments (comment*)>

<!--End of task element  -->

<!ELEMENT rev_id (#PCDATA)>

<!ELEMENT content (first_page? , last_page? , attr_type*, attribute* , total_pages_calc? , total_pages_actual? , total_tables? , num_color_figures? , num_bw_figures? , total_figures?, total_pdf_pages?)>

<!ELEMENT submission_medium (#PCDATA)>

<!ELEMENT office_contact (%person_basic; , %person_detail;)>

<!ATTLIST office_contact  user_id CDATA  #REQUIRED >
<!ELEMENT file_designation (#PCDATA)>

<!ELEMENT file_createddate  (#PCDATA)>

<!ELEMENT file_format (#PCDATA)>

<!ELEMENT file_extension (#PCDATA)>

<!ELEMENT file_caption (#PCDATA)>

<!ELEMENT file_originalname (#PCDATA)>

<!ELEMENT publish_before_print_date (%date;)>

<!ELEMENT print_scheduled_date (%date;)>

<!ELEMENT transferred_date (%date;)>

<!ELEMENT issue_journal_name (#PCDATA)>

<!ELEMENT issue_journal_id (#PCDATA)>

<!ELEMENT issue_journal_issn (#PCDATA)>

<!ELEMENT issue_journal_isbn (#PCDATA)>

<!ELEMENT issue_journal_eisbn (#PCDATA)>

<!ELEMENT issue_end_page (#PCDATA)>

<!ELEMENT issue_print_run (#PCDATA)>

<!ELEMENT issue_start_page (#PCDATA)>

<!ELEMENT transmission_date (%date;)>

<!ELEMENT line_up_number (#PCDATA)>

<!ELEMENT file_colorspace (#PCDATA)>

<!ELEMENT file_tag (#PCDATA)>

<!ELEMENT journal_abbreviation (#PCDATA)>

<!ELEMENT room (#PCDATA)>

<!ELEMENT institution_id (#PCDATA)>
<!ATTLIST institution_id  institution_id_type (Ringgold) #REQUIRED>

<!ELEMENT issue_assignment (volume? , issue? , issue_description? , issue_date? , line_up_number?, published_date?, publish_before_print_date?, print_scheduled_date?, transferred_date?, issue_journal_name?, issue_start_page?, issue_journal_id?, issue_journal_issn?, issue_journal_isbn?, issue_journal_eisbn?, issue_end_page?, issue_print_run?)>

<!ATTLIST issue_assignment  current_issue CDATA  #REQUIRED >
<!ELEMENT issue_description (#PCDATA)>

<!ELEMENT building (#PCDATA)>

<!ELEMENT post_office_box (#PCDATA)>

<!ELEMENT companion_paper (ms_id+, companion_paper_manuscript_type, companion_paper_submitting_author)>

<!ELEMENT companion_paper_manuscript_type (#PCDATA)>

<!ELEMENT companion_paper_submitting_author (#PCDATA)>

<!ELEMENT total_pages_calc (#PCDATA)>

<!ELEMENT total_pages_actual (#PCDATA)>

<!ELEMENT total_tables (#PCDATA)>

<!ELEMENT num_color_figures (#PCDATA)>

<!ELEMENT num_bw_figures (#PCDATA)>

<!ELEMENT total_figures (#PCDATA)>

<!ELEMENT num_pages_calc (#PCDATA)>

<!ELEMENT num_pages_actual (#PCDATA)>

<!ELEMENT profile_affiliation (%affil_details;)>

<!ELEMENT current_profile_affiliation (%affil_details;)>

<!ELEMENT person_title (#PCDATA)>

<!ELEMENT total_pdf_pages (#PCDATA)>

<!ELEMENT author_returned_date (%date;)>

<!--  beginning of NLM addition elements -->

<!ENTITY % block-display.class
                        "array | boxed-text | chem-struct |
                         chem-struct-wrapper | fig | fig-group |
                         graphic | media | preformat |
                         supplementary-material | table-wrap |
                         table-wrap-group"                           >

<!ENTITY % block-math.class
                        "disp-formula"                               >

<!ENTITY % just-para.class
                        "p"                                          >
                        

<!ENTITY % math.class   "tex-math | mml:math"                        > 
 
 <!ENTITY % list.class   "def-list | list"                            >

<!ENTITY % related-article.class
                        "related-article"                            >

<!ENTITY % rest-of-para.class
                        "disp-quote | speech | statement |
                         verse-group"                                >

<!ENTITY % ref-list.class
                        "ref-list"                                   >

<!ENTITY % address-link.class
                        "email | ext-link | uri"                     >
 
<!ENTITY % article-link.class
                        "inline-supplementary-material |
                         related-article"                            > 
 
<!ENTITY % emphasis.class
                        "bold | italic | monospace | overline |
                         sans-serif | sc | strike | underline "                   > 
 
<!ENTITY % inline-display.class
                        "inline-graphic | private-char"              > 
 
<!ENTITY % inline-math.class
                        "inline-formula"                             > 
 
<!ENTITY % phrase.class "abbrev | milestone-end | milestone-start |
                         named-content"                              > 
 
<!ENTITY % simple-link.class
                        "fn | target | xref"                         > 
 
<!ENTITY % subsup.class "sub | sup"                                  > 
 
<!ENTITY % name.class   "anonymous | collab | name"                  > 
 
<!ENTITY % front-back.class
                        "notes"                                      >

<!ENTITY % back.class   "ack | app-group | bio | fn-group |
                         glossary |  ref-list"                       > 
 
 <!ENTITY % sec.class    "sec"                                        >
 
 <!ENTITY % break.class  "break"                                      >

<!ENTITY % sec-level    "%sec.class;"                                >

<!ENTITY % doc-back-matter-mix
                        "%back.class; | %front-back.class; |
                         %sec-level;"                                >

<!ENTITY % back-model   "(title*, (%doc-back-matter-mix;)* )"        >

<!ELEMENT  back         %back-model;                                 >

<!ENTITY % para-level   "%block-display.class; | %block-math.class; |
                         %just-para.class; | %list.class; |
                         %math.class; | %related-article.class; |
                         %rest-of-para.class;"                       >


<!ENTITY % pub-id-types  "art-access-id | coden | doaj | doi |
                          manuscript | medline | other | pii |
                          pmcid |  pmid | publisher-id | sici | ut"       >

<!ENTITY % simple-phrase
                        "| %address-link.class; |
                         %article-link.class; |
                         %emphasis.class; | %inline-display.class; |
                         %inline-math.class; | %math.class; |
                         %phrase.class; |
                         %simple-link.class; | %subsup.class;"       >

<!ENTITY % just-rendition
                        " "                                          >

<!ENTITY % rendition-plus
                        "| %emphasis.class;  | %subsup.class;"       >
                        

<!ENTITY % label.class  "label"                                      >

<!ENTITY % references.class
                        "access-date | annotation | article-title |
                         collab | comment | conf-date | conf-loc |
                         conf-name | conf-sponsor |
                         day | edition | email | elocation-id |
                         etal | ext-link | fpage |  gov | isbn |
                         institution | issn | issue | issue-id |
                         issue-title | lpage | month | name |
                         object-id | page-count | page-range |
                         patent | person-group | pub-id |
                         publisher-loc | publisher-name | role |
                         season | series | source | std |
                         supplement | time-stamp |
                         trans-source | trans-title | uri |
                         volume | volume-id | year"                  >

<!ENTITY % citation-elements
                        "| %emphasis.class; | %inline-display.class; |
                         %inline-math.class; | %label.class; |
                         %phrase.class; | %references.class; |
                         %subsup.class;"                             >

<!ENTITY % might-link-atts
            "xmlns:xlink CDATA                            #FIXED
                                     'http://www.w3.org/1999/xlink'
             xlink:type  (simple)                   #FIXED 'simple'
             xlink:href  CDATA                            #IMPLIED
             xlink:role  CDATA                            #IMPLIED
             xlink:title CDATA                            #IMPLIED
             xlink:show  (embed | new | none | other | replace)
                                                          #IMPLIED
             xlink:actuate
                         (none | onLoad | onRequest | other)
                                                          #IMPLIED"  >

<!ENTITY % citation-atts
             "citation-type
                        (book | commun | confproc | discussion |
                         gov | journal | list | patent | thesis  |
                         web  | other)                     #IMPLIED
              id         ID                                #IMPLIED
              %might-link-atts;"                                     >

<!ENTITY % surname-elements
                        " "                                          >

<!ENTITY % given-names-elements
                        " "                                          >

<!ENTITY % title-elements
                        "%simple-phrase; | %break.class;"            >
  
<!ENTITY % volume-elements
                        " "                                          >

<!ENTITY % etal-model   "EMPTY"                                      >

<!ENTITY % emphasized-text
                        "| %address-link.class; |
                         %article-link.class; | %emphasis.class;  |
                         %inline-display.class; |
                         %inline-math.class; |  %math.class; |
                         %phrase.class; | %simple-link.class; |
                         %subsup.class;"                             >

<!ELEMENT  citation     (#PCDATA %citation-elements;)*               >

<!ATTLIST  citation
             %citation-atts;                                         >

<!ELEMENT  name         (surname, given-names?, prefix?, suffix?)    >

<!ELEMENT  surname      (#PCDATA %surname-elements;)*                >

<!ELEMENT  given-names  (#PCDATA %given-names-elements;)*            >

<!ELEMENT  article-title
                        (#PCDATA %title-elements;)*                  >

<!ELEMENT  fpage        (#PCDATA)                                    >

<!ELEMENT  lpage        (#PCDATA)                                    >

<!ELEMENT  etal         %etal-model;                                 >

<!ELEMENT  italic       (#PCDATA %emphasized-text;)*                 >

<!ELEMENT  bold         (#PCDATA %emphasized-text;)*                 >

<!ELEMENT  sc           (#PCDATA %emphasized-text;)*                 >

<!ELEMENT  sub          (#PCDATA %emphasized-text;)*                 >

<!ENTITY %  person-group-atts  
             "person-group-type 
                        CDATA                             #IMPLIED"  >

<!ENTITY %  pub-id-atts  
             "pub-id-type 
                        (%pub-id-types;)                  #IMPLIED"  >

<!ENTITY %  source-atts
             "xml:lang   NMTOKEN                           #IMPLIED" > 

<!ENTITY % ref-list-model
                        "(title?, (%para-level;)*, ref*, 
                         (%ref-list.class;)* )"                      > 

<!ELEMENT  ref-list     %ref-list-model;                             >

<!ENTITY % ref-model    "(label?, (citation | note)+ )"              > 

<!ELEMENT  ref          %ref-model;                                  >

<!ATTLIST  ref
             id         ID                                 #IMPLIED  >

<!ENTITY % note-model   "(label?, (%just-para.class;)+ )"            > 

<!ELEMENT  note         %note-model;                                 > 

<!ATTLIST  note
             id         ID                                 #IMPLIED  >


<!-- ============================================================= -->
<!--                    BIBLIOGRAPHIC REFERENCE CLASS              -->
<!-- ============================================================= -->

<!ENTITY % access-date-elements 
                        " "                                          >

<!ELEMENT  access-date  (#PCDATA %access-date-elements;)*            >

<!ENTITY % comment-elements 
                        "%simple-phrase;"                            >

<!ELEMENT  comment      (#PCDATA %comment-elements;)*                >
<!ATTLIST comment to_name CDATA  #IMPLIED>
<!ATTLIST comment to_role  CDATA #IMPLIED>

<!ENTITY % edition-elements
                        "%just-rendition;"                           >

<!ELEMENT  edition      (#PCDATA %edition-elements;)*                >

<!ENTITY % gov-elements "%rendition-plus;"                           >

<!ELEMENT  gov          (#PCDATA %gov-elements;)*                    >

<!ELEMENT  isbn         (#PCDATA)                                    >

<!ENTITY % patent-elements 
                        "%just-rendition;"                           >

<!ELEMENT  patent       (#PCDATA %patent-elements;)*                 >

<!ENTITY % person-group-model
                        "(%name.class; | aff | etal)*"               >

<!ELEMENT  person-group %person-group-model;                         >

<!ATTLIST  person-group 
             %person-group-atts;                                     >

<!ELEMENT  pub-id       (#PCDATA)                                    >

<!ATTLIST  pub-id  
             %pub-id-atts;                                           >

<!ENTITY % series-elements "%rendition-plus;"                        >

<!ELEMENT  series       (#PCDATA %series-elements;)*                 >

<!ENTITY % std-elements "%rendition-plus;"                           >

<!ELEMENT  std          (#PCDATA %std-elements;)*                    >

<!ENTITY % source-elements
                        "| %emphasis.class; | %address-link.class; |
                         %subsup.class;"                             >

<!ELEMENT  source       (#PCDATA %source-elements;)*                 >

<!ATTLIST  source
             %source-atts;                                           > 

<!ENTITY % time-stamp-elements
                        " "                                          >

<!ELEMENT  time-stamp   (#PCDATA %time-stamp-elements;)              >

<!ELEMENT  trans-source (#PCDATA %source-elements;)*                 >

<!ATTLIST  trans-source
             %source-atts;                                           > 

<!ELEMENT researcher_id (#PCDATA)>
<!--ORCID-002 S -->
<!ELEMENT orcid (#PCDATA)>
<!--ORCID-002 E-->
<!-- ORCID-P2-007 -->
<!ELEMENT orcid_id_validation (#PCDATA)>
<!ELEMENT orcid_token_type (#PCDATA)>
<!ELEMENT orcid_token_scope (#PCDATA)>
<!ELEMENT orcid_token_expires_in (#PCDATA)>
<!-- US-001537 S -->
<!ELEMENT publication_model (#PCDATA)>
<!-- US-001537 E -->

<!ELEMENT publons_optIn (#PCDATA)>

<!-- US-002026 E -->
<!--US-002844-->
<!ELEMENT credit_taxonomy_role_list (credit_taxonomy_role*)>
<!ATTLIST credit_taxonomy_role_list role_content_type CDATA  #FIXED
					"http://credit.casrai.org/">

<!ELEMENT credit_taxonomy_role (#PCDATA)>
<!ATTLIST credit_taxonomy_role contrib_id CDATA  #REQUIRED>
<!ATTLIST credit_taxonomy_role contrib_degree CDATA #IMPLIED>
